# Supplementary material
Source: publisher figshare collection journal article supplement (https://sage.figshare.com/ndownloader/files/20537376)
Supplement: Supplementary file 1 [file 20537376]

Supplemental material for How 3D Visualization Can Help Us Understand Spatial Inequality:  
On Social Distance and Crime by [Author names] in Environment and Planning B”.

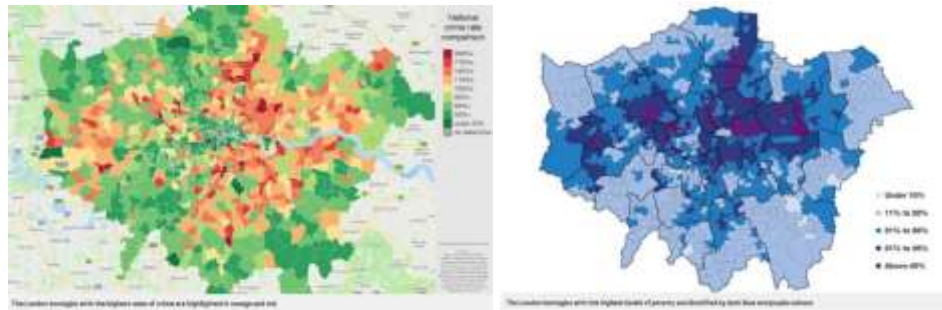

Figure 2: Crime rates (left) and poverty rates (right) in London in 2018, by statistical area (Drewett, 2018). An example of a side-by-side mapping of crime and poverty.

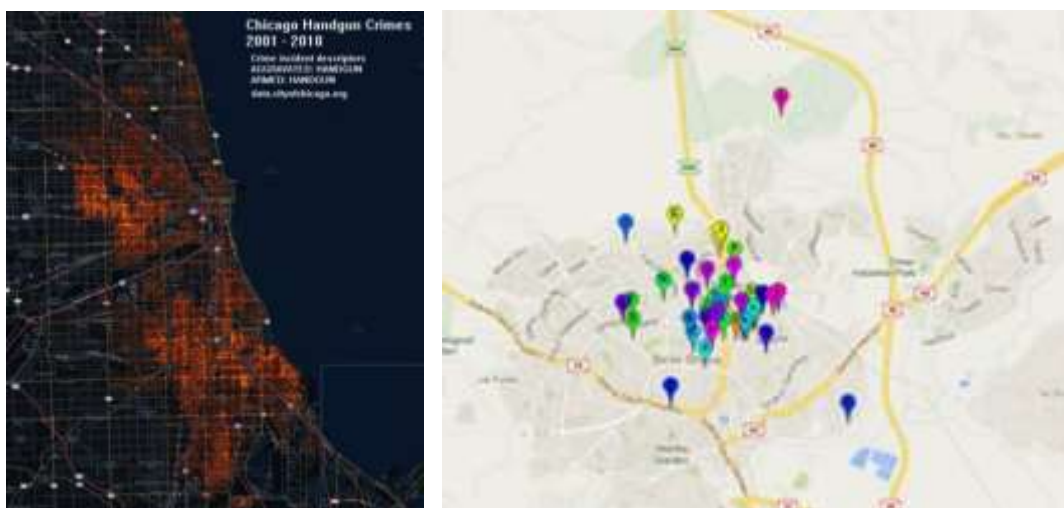

Figure 3: a. (on the left) Heat map of Chicago handgun crimes.<sup>1</sup> b.(on the right) Interactive map of sexual harassment incidents in the city of Beer Sheva, Israel.

The interactive map (3b) often serves as a means of “public participation” or social action that aims to bring about change, as reflected in the following mapping of sexual harassment. This particular project was initiated by a group of students who sought to break the silence regarding this phenomenon and to enable women to protect one another by anonymously reporting incidents on an interactive mapping platform.

---

<sup>1</sup>Web source : <http://mantascodes.com/chicago-handgun-crime-maps-2001-2018/>

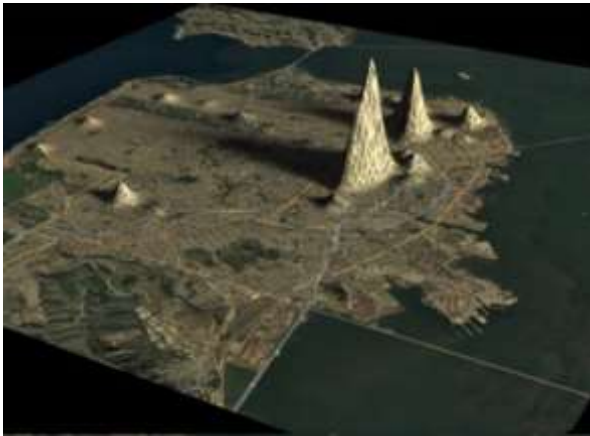

Figure 4: Prostitution in San Francisco, 2009.<sup>2</sup>

Modeling crime-space relations has been through the use of 3D techniques, as reflected in the mapping of prostitution in San Francisco as mountains (histograms) on the explicit map of San Francisco.

---

<sup>2</sup>Web source: <https://www.gislounge.com/crime-mapping-and-analysis/>
